# Supplementary material
Source: publisher figshare collection journal article supplement (https://tandf.figshare.com/ndownloader/files/17822900)
Supplement: Supplementary file 1 [file 17822900]

**Supplementary Table 1. Primers used in this study.**

| Purpose | Primer name | Sequence (5'-3') |
| --- | --- | --- |
| PLGNL vector construction | MaRGS F | ggggtaccATGGGAAGCTGTGCAGTGGAAG |
| MaRGS R | ggaattcTCAGTCGAAAGAATCGCAGCCA |
| pFGC5941 vectors construction | MaRGSox/i-F-Xho I | agaggacacgctcgagATGGGAAGCTGTGCAGTGGAAG |
| MaRGSox-R-Xba I | taattaactctctagaTCAGTCGAAAGAATCGCAGCCA |
| MaRGSi-R-Nco I | tgggcgcgccccatggACGTGACCGGAACTATCCAT |
| MaRGSi-F-BamH I | gcaggtatttggatccACGTGACCGGAACTATCCAT |
| MaRGSi-R-Xba I | taattaactctctagaATGGGAAGCTGTGCAGTGGAAG |
| Expression  pattern  analysis | MaRGS F | TATGTGTGGGCAGTCTGGAT |
| MaRGS R | AGACGCCTCTTGACGAAGAT |
| MaATG7 F | CGACTATCAGGCATCTCAAGGATTGG |
| MaATG7 R | AATGAGAGCAAGGAAGTTCCGAAGG |
| MaATG8 F | GTGGGAGTTTCGCCATGTCC |
| MaATG8 R | TTGATGCGACGAGCTTCTGC |
| MaWNK1 F | GAGCGGTGAAGCACTGGTGTAG |
| MaWNK1 R | AGAATTGCTGCTAGGCCAAGATCAC |
| MaWNK8 F | CTGACGATGGTGGAGTTGTGGAG |
| MaWNK8 R | CACTTGGTTCCAAGCTACTTCAATTCC |
| MaACTIN3 F | GCATGAAGATCAAGGTGGTG |
| MaACTIN3 R | CATCTGCTGGAAGGTGCTAA |
| NtATG8f F | CACCATGGCAAAGAGTTCATTC |
| NtATG8f R | CCATGAAAGTTACACCAAGTTG |
| NtATG6 F | AAGCAAAGAAATCAGGGACC |
| NtATG6 R | GGAGGCAAAACCACGAATG |
| NtATG8a F | GCTCGTATCAGGGAGAAGTATC |
| NtATG8a R | AAATTGCCCCACAGTCAGA |
| NtWNK8 F | TTGCTGAATTGACTGGTCGGATTAGG |
| NtWNK8 R | AGCTATTGTCGCTACATCGTCGTTC |
| NtWNK9 F | TGCAGACAGATCTTGAATGGACTTCTC |
| NtWNK9 R | AACTCAGGCGTTCCGACACAATG |
| NtSOD F | AGCTACATGACGCCATTTCC |
| NtSOD R | CCCTGTAAAGCAGCACCTTC |
| NtCAT F | AGGTACCGCTCATTCACACC |
| NtCAT R | AAGCAAGCTTTTGACCCAGA |
| NtActin F | TCACAGAAGCTCCTCCTAATCCA |
| NtActin R | GAGGGAAAGAACAGCCTGAATG |
